# Supplementary material for: Identification and Evaluation of Aromatic Volatile Compounds in 26 Cultivars and 8 Hybrids of Freesia hybrida
Source: MDPI journal article supplement (doi:10.3390/molecules26154482), 2021-07-25
Supplement: s1 [file s1]

## SUPPLEMENTARY INFO

### Identification and evaluation of aromatic volatile compounds in 26 cultivars and 8 hybrids of *Freesia hybrida*

Shidan Weng <sup>1</sup>, Xueqing Fu <sup>1</sup>, Yu Gao <sup>2</sup>, Tianlei Liu <sup>1</sup>, Yi sun <sup>1</sup> and Dongqin Tang <sup>1,\*</sup>

<sup>1</sup> School of Design, Shanghai Jiao Tong University, Shanghai 200240, China

<sup>2</sup> Instrumental Analysis Center, Shanghai Jiao Tong University, Shanghai 200240, China

*Correspondence to:*

Dongqin Tang

School of Design, Shanghai Jiao Tong University, Shanghai 200240, China

E-mail: dqtang@sjtu.edu.cn;

Tel.: +86-21-34205730

Supplementary Figure

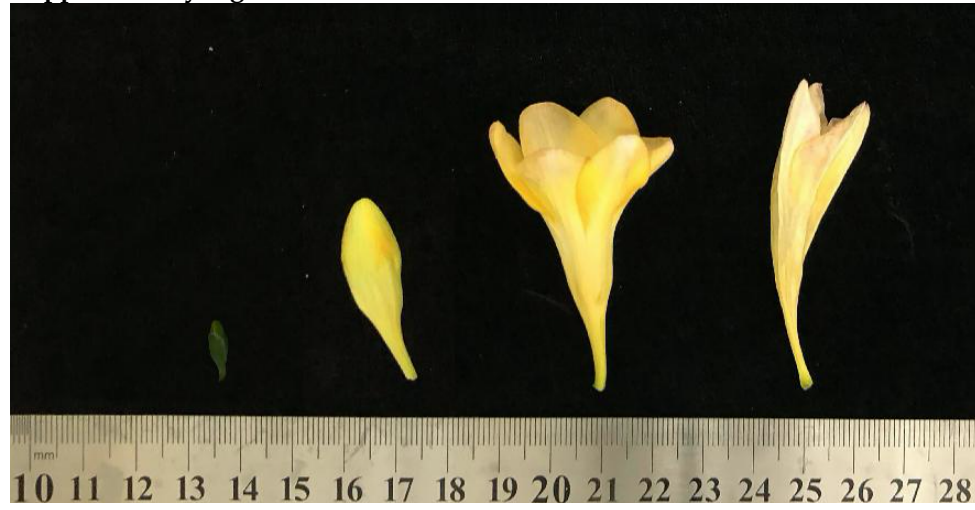

**Figure S1.** Flowers of *F. hybrida* 'SN Jinhuanghou' in four developmental stages (From left to light: green bud, bud with full color, full open flower, wilting flower).

Supplementary Table  
Table S1. Relative content (>0.05%) of VOCs in 34 *F. hybrida* germplasms.

| Compounds                 | CAS        | RI      | SI (%) | Relative content (%) |      |      |      |      |      |      |      |       |      |      |      |      |      |      |      |      |      |      |
|---------------------------|------------|---------|--------|----------------------|------|------|------|------|------|------|------|-------|------|------|------|------|------|------|------|------|------|------|
|                           |            |         |        | AN                   | CAL  | SB   | PP   | VE   | HTG  | RX   | ZMG  | SO    | JHH  | FS   | LL   | SN   | HJ   | GR   | WR   | RP   | CA   | MA   |
| Ethyl DL-Leucate          | 10348-47-7 | N/A     | 9      | -                    | -    | -    | -    | -    | -    | -    | -    | -     | -    | -    | -    | 0.15 | -    | -    | -    | -    | -    | -    |
| Vinyl Formate             | 692-45-5   | N/A     | 5      | -                    | -    | -    | -    | -    | -    | -    | -    | -     | -    | -    | -    | 0.20 | -    | -    | -    | -    | -    | -    |
| Acetaldehyde              | 75-07-0    | N/A     | 83     | -                    | -    | -    | -    | -    | -    | -    | -    | -     | -    | -    | -    | -    | -    | -    | -    | -    | -    | -    |
| 4-Methyl-1,3-Pentadiene   | 926-56-7   | N/A     | 94     | -                    | -    | -    | -    | -    | -    | -    | -    | -     | -    | -    | -    | -    | 4.15 | -    | -    | -    | -    | -    |
| 3-Methylfuran             | 930-27-8   | 941.82  | 91     | 0.20                 | -    | -    | -    | 0.09 | -    | -    | -    | -     | -    | 0.07 | -    | 0.24 | -    | -    | -    | -    | -    | -    |
| 2-Methyl Furan            | 534-22-5   | 941.97  | 91     | -                    | -    | -    | -    | -    | -    | -    | -    | -     | -    | -    | -    | -    | -    | -    | -    | -    | -    | 0.05 |
| Methyl ethyl ketone       | 78-93-3    | 943.87  | 86     | -                    | -    | 0.06 | -    | -    | -    | -    | -    | -     | -    | -    | -    | -    | 0.11 | -    | -    | -    | -    | -    |
| Ethyl Acetate             | 141-78-6   | N/A     | 91     | -                    | -    | -    | 0.21 | -    | -    | 0.17 | -    | -     | -    | -    | -    | -    | -    | -    | -    | -    | -    | -    |
| Nonane                    | 111-84-2   | N/A     | 86     | -                    | -    | -    | -    | -    | -    | -    | -    | -     | -    | -    | -    | -    | -    | -    | -    | -    | -    | -    |
| Ethanol                   | 64-17-5    | 959.32  | 91     | -                    | 1.27 | -    | 0.79 | -    | -    | 0.65 | 0.86 | -     | -    | -    | -    | -    | -    | -    | -    | 2.34 | -    | 0.53 |
| $\alpha$ -Thujene         | 2867-05-2  | 1021.30 | 94     | -                    | -    | -    | 0.24 | -    | -    | -    | -    | -     | 1.60 | -    | -    | -    | -    | -    | -    | -    | -    | -    |
| Toluene                   | 108-88-3   | 1035.70 | 74     | -                    | -    | -    | -    | -    | -    | -    | -    | -     | -    | -    | -    | -    | 0.11 | -    | -    | -    | -    | -    |
| L- $\alpha$ -Pinene       | 7785-26-4  | N/A     | 97     | -                    | 0.24 | 0.20 | 0.95 | 1.52 | -    | -    | -    | -     | -    | -    | 4.35 | -    | -    | -    | -    | -    | 0.15 | -    |
| Cyclofenchene             | 488-97-1   | N/A     | 97     | -                    | -    | -    | -    | -    | -    | -    | -    | -     | -    | -    | -    | -    | -    | -    | -    | -    | -    | 0.06 |
| (+)- $\alpha$ -Pinene     | 7785-70-8  | 1015.90 | 97     | -                    | 0.24 | -    | -    | -    | 0.69 | 0.40 | -    | 14.56 | 5.65 | 0.36 | -    | 0.74 | 0.74 | 0.1  | -    | 0.17 | -    | -    |
| Camphene                  | 79-92-5    | 1056.10 | 97     | -                    | -    | -    | -    | -    | -    | 0.10 | -    | 9.4   | 0.35 | -    | -    | -    | -    | -    | -    | -    | -    | -    |
| 2-Methyl Butyronitrile    | 18936-17-9 | 1085.70 | 59     | -                    | -    | -    | -    | -    | -    | -    | -    | -     | -    | -    | -    | -    | -    | -    | -    | -    | 0.05 | -    |
| Undecane                  | 1120-21-4  | 1091.10 | 95     | -                    | -    | 0.08 | -    | -    | -    | -    | -    | -     | -    | -    | -    | -    | -    | 0.07 | -    | -    | -    | 0.19 |
| (-)- $\beta$ -Pinene      | 18172-67-3 | 1091.50 | 94     | -                    | -    | -    | -    | -    | -    | -    | -    | -     | -    | 0.12 | -    | -    | -    | -    | -    | -    | -    | -    |
| (-)-Camphene              | 5794-04-7  | N/A     | 97     | -                    | -    | -    | -    | -    | -    | -    | -    | -     | -    | -    | 0.32 | -    | 0.26 | -    | -    | -    | -    | -    |
| 1,4-Butanediol Diacrylate | 1070-70-8  | N/A     | 56     | -                    | -    | -    | -    | -    | -    | -    | -    | -     | -    | -    | -    | -    | -    | -    | -    | -    | -    | -    |
| Phytane                   | 638-36-8   | N/A     | 72     | -                    | -    | -    | -    | -    | -    | -    | -    | -     | -    | -    | -    | -    | -    | -    | -    | -    | -    | -    |
| 2-Methyl Decane           | 6975-98-0  | N/A     | 50     | -                    | -    | -    | -    | -    | -    | -    | -    | -     | -    | -    | -    | -    | -    | -    | -    | -    | -    | -    |
| $\beta$ -Pinene           | 127-91-3   | N/A     | 90     | -                    | -    | -    | -    | 0.32 | -    | -    | -    | 3.57  | 1.42 | -    | 1.36 | 0.18 | 0.13 | 0.07 | -    | -    | -    | -    |
| $\beta$ -Thujene          | 28634-89-1 | 1105.90 | 94     | -                    | -    | -    | -    | -    | -    | 0.13 | -    | -     | -    | -    | -    | 0.50 | -    | -    | -    | -    | -    | -    |
| Sabinene                  | 3387-41-5  | 1107.20 | 96     | -                    | -    | 0.09 | 0.45 | 1.44 | -    | -    | -    | 0.55  | 5.32 | 0.43 | 4.42 | -    | -    | -    | -    | -    | -    | -    |
| $\alpha$ -Phellandrene    | 99-83-2    | 1142.70 | 91     | -                    | -    | -    | -    | -    | -    | -    | -    | -     | -    | -    | 2.56 | 0.06 | -    | 0.05 | -    | -    | -    | -    |
| Agmatine                  | 306-60-5   | 1143.40 | 17     | -                    | -    | -    | -    | -    | -    | -    | -    | -     | -    | -    | -    | -    | -    | -    | -    | -    | -    | -    |
| $\beta$ -Myrcene          | 123-35-3   | 1148.80 | 93     | 2.48                 | 1.15 | 1.88 | 6.46 | 3.71 | 1.88 | 2.43 | -    | 0.54  | 7.47 | 3.52 | 8.07 | 3.44 | 1.48 | 1.67 | 0.66 | 0.96 | 0.47 | 0.85 |

|                                                            |            |         |    |      |       |       |       |       |      |      |      |      |       |      |       |      |      |       |      |      |      |      |
|------------------------------------------------------------|------------|---------|----|------|-------|-------|-------|-------|------|------|------|------|-------|------|-------|------|------|-------|------|------|------|------|
| (+)-2-Carene                                               | 4497-92-1  | N/A     | 97 | -    | -     | -     | 0.77  | 0.37  | -    | -    | -    | -    | 0.82  | -    | 0.76  | -    | -    | -     | -    | -    | 0.08 | -    |
| 1-Methylene-2-Methyl-3-Isopropenylcyclopentane             | 56710-83-9 | N/A     | 91 | -    | -     | -     | -     | -     | -    | -    | -    | -    | -     | -    | -     | -    | -    | -     | -    | -    | -    | -    |
| α-Terpinene                                                | 99-86-5    | 1156.50 | 97 | -    | -     | 0.08  | -     | -     | -    | -    | -    | -    | -     | -    | -     | -    | -    | -     | -    | -    | -    | -    |
| 2,3-Dihydro-1,8-Cineole                                    | 92760-25-3 | 1182.70 | 72 | -    | -     | -     | -     | -     | -    | -    | -    | -    | -     | -    | -     | -    | -    | -     | -    | -    | -    | -    |
| Eucalyptol                                                 | 470-82-6   | 1191.10 | 90 | -    | 0.23  | -     | 0.87  | 1.60  | -    | -    | -    | -    | 7.11  | 1.20 | 8.94  | 1.01 | -    | 0.12  | -    | -    | -    | -    |
| Dipentene                                                  | 138-86-3   | 1193.20 | 94 | -    | -     | -     | -     | -     | -    | -    | -    | -    | -     | -    | -     | -    | -    | -     | -    | 0.08 | 0.08 | -    |
| (E)-dehydroxylinalool oxide                                | 54750-70-8 | N/A     | 97 | 0.11 | -     | 0.19  | -     | 8.28  | -    | 0.11 | -    | -    | -     | -    | -     | -    | 0.05 | 0.11  | -    | 0.11 | -    | -    |
| D-Limonene                                                 | 5989-27-5  | 1176.10 | 97 | 0.68 | 0.60  | 0.75  | 11.70 | 5.86  | 1.14 | 1.43 | 0.47 | 6.24 | 18.14 | 2.36 | 16.28 | 2.56 | 0.70 | 0.88  | 0.17 | 0.5  | 0.63 | 0.35 |
| (Z)-Dehydroxylinalool Oxide                                | 54750-69-5 | 1198.90 | 59 | -    | -     | -     | -     | -     | -    | -    | -    | -    | -     | 0.05 | -     | -    | -    | -     | -    | -    | -    | -    |
| β-Terpinene                                                | 99-84-3    | 1219.70 | 91 | -    | -     | -     | -     | -     | -    | -    | -    | -    | -     | -    | -     | -    | -    | 0.33  | -    | -    | -    | -    |
| (E)-β-Ocimene                                              | 13877-91-3 | 1241.00 | 94 | 0.55 | 41.43 | 18.44 | 3.11  | 17.36 | 1.72 | 0.51 | -    | -    | 0.97  | 0.55 | 0.40  | 0.75 | 2.92 | 17.08 | 7.07 | 1.59 | 7.46 | 0.17 |
| 3,7,7-trimethyl-1,3,5-cycloheptatriene                     | 3479-89-8  | N/A     | 81 | -    | -     | -     | -     | -     | -    | -    | -    | -    | -     | -    | -     | 0.20 | -    | -     | -    | -    | -    | -    |
| (1S,3S)-(E)-4-Carene                                       | 5208-50-4  | 1261.40 | 91 | -    | -     | -     | -     | -     | -    | -    | -    | -    | -     | -    | -     | -    | -    | -     | -    | -    | -    | -    |
| (+)-3-Carene                                               | 498-15-7   | N/A     | 94 | -    | -     | -     | -     | -     | -    | -    | -    | -    | -     | -    | -     | -    | -    | -     | -    | -    | 0.17 | -    |
| α-Pinene                                                   | 80-56-8    | N/A     | 95 | -    | -     | -     | -     | -     | -    | -    | -    | -    | -     | -    | -     | -    | -    | 0.42  | -    | -    | -    | -    |
| β-phellandrene                                             | 555-10-2   | 1184.30 | 95 | -    | 0.09  | 0.09  | 0.30  | 0.23  | -    | -    | -    | -    | -     | 0.19 | 0.68  | 0.26 | 0.08 | 0.11  | -    | -    | 0.06 | -    |
| γ-Terpinene                                                | 99-85-4    | 1226.90 | 97 | -    | -     | 0.06  | 1.38  | 0.47  | -    | 0.13 | -    | -    | 1.49  | 0.17 | 1.26  | 0.42 | 0.11 | -     | -    | -    | -    | -    |
| (Z)-β-Ocimene                                              | 3338-55-4  | 1239.60 | 95 | 1.89 | -     | -     | -     | -     | -    | 1.40 | -    | -    | 0.72  | 1.60 | 0.95  | 5.61 | -    | -     | 5.63 | -    | -    | 1.68 |
| α-Ocimene                                                  | 502-99-8   | 1243.50 | 95 | -    | -     | -     | -     | -     | -    | -    | -    | -    | -     | -    | -     | -    | -    | -     | -    | -    | -    | -    |
| Cyclopropane, 1,1-dimethyl-2-(3-methyl-1,3-butadien-1-yl)- | 68998-21-0 | N/A     | 93 | -    | 0.15  | 0.09  | -     | -     | -    | -    | -    | -    | -     | -    | -     | -    | -    | -     | -    | -    | -    | -    |
| Bicyclo[3.1.1]hept-2-ene,3-o-Cymene                        | 4889-83-2  | 1254.60 | 94 | -    | -     | -     | -     | -     | -    | -    | -    | -    | -     | -    | -     | -    | -    | -     | -    | -    | -    | -    |
| Isoterpinolene                                             | 527-84-4   | 1256.90 | 94 | -    | -     | -     | 0.35  | -     | -    | -    | -    | -    | 0.28  | 0.12 | -     | -    | -    | -     | -    | -    | -    | -    |
| m-Cymene                                                   | 586-63-0   | 1259.40 | 90 | -    | -     | -     | -     | -     | -    | -    | -    | -    | -     | -    | 0.05  | -    | -    | -     | -    | -    | -    | -    |
| Terpinolene                                                | 535-77-3   | 1263.50 | 93 | -    | -     | -     | -     | -     | -    | -    | -    | -    | -     | -    | 0.25  | -    | 0.05 | 0.11  | -    | -    | -    | -    |
| (+)-4-Carene                                               | 29050-33-7 | 1267.40 | 96 | -    | -     | -     | -     | -     | -    | 0.24 | -    | -    | -     | -    | -     | 0.87 | -    | -     | -    | -    | -    | -    |
| p-Cymene                                                   | 99-87-6    | 1270.40 | 91 | -    | -     | -     | -     | -     | -    | -    | -    | -    | 0.28  | -    | -     | -    | -    | -     | -    | -    | 0.12 | -    |
| δ-3-carene                                                 | 13466-78-9 | N/A     | 91 | -    | -     | -     | -     | -     | -    | -    | -    | -    | -     | -    | -     | -    | -    | -     | -    | -    | -    | -    |

|                                        |              |         |    |      |      |      |      |      |      |   |   |   |   |      |      |      |      |      |      |      |      |      |   |
|----------------------------------------|--------------|---------|----|------|------|------|------|------|------|---|---|---|---|------|------|------|------|------|------|------|------|------|---|
| 2-Ethyl-1,4-Dimethyl                   |              |         |    |      |      |      |      |      |      |   |   |   |   |      |      |      |      |      |      |      |      |      |   |
| Benzene                                | 1758-88-9    | N/A     | 60 | -    | -    | -    | -    | -    | -    | - | - | - | - | -    | -    | -    | -    | -    | -    | -    | -    | -    | - |
| 2-Carene                               | 554-61-0     | N/A     | 96 | -    | -    | -    | -    | -    | -    | - | - | - | - | -    | -    | -    | -    | -    | -    | 0.06 | -    | -    | - |
| Tridecane                              | 629-50-5     | 1295.20 | 95 | -    | -    | -    | -    | -    | -    | - | - | - | - | -    | -    | 0.05 | -    | -    | -    | -    | -    | -    | - |
| Oxalic acid, allyl pentyl ester        | 1000309-23-2 | 1332.10 | 64 | -    | -    | -    | -    | -    | -    | - | - | - | - | -    | -    | -    | -    | -    | -    | -    | -    | -    | - |
| Methyl Heptenone                       | 110-93-0     | 1336.30 | 92 | -    | -    | -    | -    | -    | -    | - | - | - | - | 0.05 | -    | 0.11 | -    | -    | -    | -    | -    | -    | - |
| Pentyl Propyl Ether                    | 18641-82-2   | N/A     | 78 | -    | -    | -    | -    | -    | -    | - | - | - | - | -    | 0.53 | -    | -    | 0.07 | -    | -    | -    | -    | - |
| Alloocimene                            | 673-84-7     | 1372.60 | 94 | 0.17 | 1.01 | 0.50 | 0.07 | -    | -    | - | - | - | - | 0.20 | 0.05 | 0.47 | 0.06 | 0.34 | 0.14 | 0.06 | 0.09 | 0.12 | - |
| 1,5,5,6-Tetramethylcyclohexa-1,3-Diene | 514-94-3     | 1375.90 | 94 | -    | -    | -    | -    | -    | -    | - | - | - | - | -    | -    | -    | -    | -    | -    | -    | -    | -    | - |
| 3,4-Dimethyl-2,4,6-Octatriene          | 57396-75-5   | 1378.60 | 87 | -    | -    | -    | -    | -    | -    | - | - | - | - | -    | -    | -    | -    | -    | -    | -    | -    | -    | - |
| 1,2,3,4,5-Pentamethylcyclopentadiene   | 4045-44-7    | 1381.30 | 97 | -    | -    | -    | -    | -    | -    | - | - | - | - | -    | -    | -    | -    | -    | -    | -    | -    | -    | - |
| p-Mentha-1,3,8-Triene                  | 18368-95-1   | 1385.10 | 96 | -    | 0.11 | -    | -    | -    | -    | - | - | - | - | -    | -    | -    | -    | 0.05 | -    | -    | -    | -    | - |
| Fenchone                               | 1195-79-5    | 1387.70 | 53 | -    | -    | -    | -    | -    | -    | - | - | - | - | -    | 0.06 | -    | -    | -    | -    | -    | -    | -    | - |
| 2-Methyl-4-Hydroxyacetophenone         | 875-59-2     | N/A     | 80 | -    | -    | -    | -    | -    | 0.30 | - | - | - | - | -    | -    | -    | -    | -    | -    | -    | -    | -    | - |
| Thymol                                 | 89-83-8      | 1403.00 | 83 | -    | -    | -    | -    | -    | -    | - | - | - | - | -    | -    | -    | -    | -    | -    | -    | -    | -    | - |
| Durenol                                | 527-35-5     | N/A     | 76 | -    | -    | -    | -    | -    | -    | - | - | - | - | -    | -    | -    | -    | -    | -    | -    | -    | -    | - |
| Rosefuran                              | 15186-51-3   | 1403.50 | 97 | -    | 0.40 | 0.22 | 0.08 | 0.09 | -    | - | - | - | - | -    | -    | 8.05 | -    | 0.09 | 0.06 | 0.05 | 0.09 | -    | - |
| 3-Tert-Butylphenol                     | 585-34-2     | N/A     | 83 | -    | -    | -    | -    | -    | -    | - | - | - | - | -    | -    | 0.06 | -    | -    | -    | -    | -    | -    | - |
| Perillen                               | 539-52-6     | 1416.90 | 93 | -    | 0.06 | -    | -    | -    | -    | - | - | - | - | 1.20 | 0.06 | 9.29 | -    | -    | -    | -    | -    | -    | - |
| o-Methyl Anisole                       | 578-58-5     | 1405.60 | 95 | -    | -    | -    | -    | -    | -    | - | - | - | - | -    | -    | -    | -    | -    | -    | -    | -    | -    | - |
| p-α-Dimethyl Styrene                   | 1195-32-0    | 1432.90 | 96 | -    | -    | -    | 0.14 | -    | -    | - | - | - | - | -    | 0.07 | 0.09 | -    | -    | -    | -    | -    | -    | - |
| (E)-Linalool Oxide (furanoid)          | 5989-33-3    | 1441.90 | 91 | -    | -    | -    | -    | -    | -    | - | - | - | - | -    | -    | -    | -    | -    | -    | -    | -    | -    | - |
| Cosmene                                | 460-01-5     | 1444.60 | 96 | -    | 0.32 | 0.27 | -    | 0.19 | -    | - | - | - | - | -    | -    | 0.12 | 0.16 | 0.12 | 0.14 | -    | -    | -    | - |
| Nerol Oxide                            | 1786-08-9    | N/A     | 96 | -    | -    | -    | -    | -    | -    | - | - | - | - | -    | -    | 0.40 | -    | -    | -    | -    | -    | -    | - |
| (-)-limonene oxide                     | 32543-51-4   | 1452.20 | 97 | -    | -    | -    | -    | -    | -    | - | - | - | - | -    | 0.09 | -    | -    | -    | -    | -    | -    | -    | - |
| β-Terpineol                            | 7299-41-4    | N/A     | 95 | -    | -    | -    | -    | -    | -    | - | - | - | - | -    | 0.51 | -    | -    | -    | -    | -    | -    | -    | - |

[illegible]

|                                                                                                             |            |         |    |      |      |      |       |      |      |      |      |      |       |      |       |      |      |      |      |      |      |      |
|-------------------------------------------------------------------------------------------------------------|------------|---------|----|------|------|------|-------|------|------|------|------|------|-------|------|-------|------|------|------|------|------|------|------|
| (E)- $\alpha$ -Damascone                                                                                    | 24720-09-0 | 1633.10 | 52 | -    | -    | -    | -     | -    | -    | -    | -    | -    | -     | -    | -     | -    | -    | -    | -    | -    | -    | -    |
| Naphthalene,<br>1,2,3,4,4a,5,6,7-octahydro-<br>4-methyl-7-methylene-1-<br>(1-methylethyl)-,<br>(1S,4R,4aS)- | 54274-73-6 | 1636.60 | 96 | -    | -    | -    | -     | -    | -    | -    | -    | -    | -     | -    | -     | -    | -    | 0.07 | -    | -    | 0.14 | -    |
| Rotundene                                                                                                   | 65128-08-7 | 1637.10 | 62 | -    | -    | -    | -     | 0.24 | -    | -    | -    | -    | -     | -    | -     | -    | -    | -    | 0.22 | -    | -    | -    |
| $\alpha$ -Damascone                                                                                         | 31089-90-4 | 1637.50 | 58 | -    | -    | -    | -     | -    | -    | -    | -    | -    | -     | -    | -     | -    | -    | -    | -    | -    | -    | -    |
| (E)- $\beta$ -Farnesene                                                                                     | 18794-84-8 | 1641.50 | 38 | -    | -    | -    | -     | -    | -    | -    | -    | -    | -     | -    | -     | -    | -    | -    | -    | -    | 0.05 | -    |
| 2-epi-Trans- $\beta$ -<br>Caryophyllene                                                                     | 68832-35-9 | 1644.00 | 99 | -    | -    | -    | -     | -    | -    | -    | -    | -    | -     | -    | -     | -    | -    | -    | -    | -    | -    | -    |
| Safranal                                                                                                    | 116-26-7   | 1646.10 | 98 | -    | -    | -    | -     | -    | -    | -    | -    | -    | -     | -    | -     | -    | -    | -    | -    | -    | -    | -    |
| (Z)-Citral                                                                                                  | 106-26-3   | N/A     | 96 | -    | -    | -    | -     | -    | -    | -    | -    | -    | -     | -    | -     | 2.18 | -    | -    | -    | -    | -    | -    |
| (+)- $\gamma$ -Gurjunene                                                                                    | 22567-17-5 | 1653.70 | 90 | -    | -    | -    | -     | -    | -    | -    | -    | -    | -     | -    | -     | -    | -    | -    | -    | -    | -    | -    |
| 10-Epizonarene                                                                                              | 41702-63-0 | 1671.60 | 91 | -    | -    | -    | -     | -    | -    | -    | -    | -    | -     | -    | -     | -    | -    | 0.05 | -    | -    | -    | -    |
| (-)- $\alpha$ -Gurjunene                                                                                    | 489-40-7   | 1672.40 | 99 | -    | 0.14 | -    | -     | -    | -    | -    | 0.84 | 0.43 | -     | -    | -     | -    | -    | 0.26 | -    | -    | 0.28 | -    |
| Piperitenone                                                                                                | 491-09-8   | 1728.20 | 53 | -    | -    | -    | -     | -    | -    | -    | -    | -    | -     | -    | -     | -    | -    | -    | -    | -    | 0.05 | -    |
| Eudesma-3,7(11)-Diene                                                                                       | 6813-21-4  | 1742.10 | 58 | -    | -    | -    | -     | 0.17 | -    | -    | -    | -    | -     | -    | -     | -    | -    | -    | -    | -    | -    | -    |
| $\delta$ -Selinene                                                                                          | 473-14-3   | N/A     | 93 | -    | -    | -    | -     | -    | -    | -    | -    | -    | -     | -    | -     | -    | -    | -    | -    | -    | -    | -    |
| $\beta$ -Maaliene                                                                                           | 489-29-2   | N/A     | 93 | -    | -    | -    | -     | -    | -    | -    | -    | -    | -     | -    | -     | -    | -    | -    | 0.24 | -    | -    | -    |
| (-)-Isolatedene                                                                                             | 95910-36-4 | N/A     | 95 | -    | -    | -    | -     | -    | -    | -    | -    | -    | -     | -    | -     | -    | -    | -    | -    | 0.05 | -    | 0.15 |
| (+)-Calarene                                                                                                | 17334-55-3 | N/A     | 80 | -    | -    | -    | -     | -    | -    | -    | -    | -    | -     | -    | -     | -    | -    | -    | -    | -    | -    | -    |
| $\alpha$ -Panasinsene                                                                                       | 56633-28-4 | N/A     | 93 | -    | -    | -    | -     | -    | -    | -    | -    | -    | -     | -    | -     | -    | -    | -    | 0.15 | -    | -    | -    |
| Alloaromadendrene                                                                                           | 25246-27-9 | N/A     | 53 | -    | -    | -    | -     | -    | -    | -    | -    | -    | -     | -    | -     | -    | -    | -    | -    | -    | 0.05 | -    |
| $\gamma$ -Muurolene                                                                                         | 30021-74-0 | 1687.20 | 97 | -    | -    | -    | -     | 0.10 | -    | -    | -    | -    | -     | -    | -     | -    | -    | 0.24 | -    | -    | -    | -    |
| Ketoisophorone                                                                                              | 1125-21-9  | 1693.90 | 91 | -    | -    | -    | -     | -    | -    | -    | -    | -    | -     | -    | -     | -    | -    | -    | -    | -    | -    | -    |
| Citral                                                                                                      | 5392-40-5  | N/A     | 91 | -    | -    | -    | -     | -    | -    | -    | -    | -    | -     | -    | -     | 2.67 | -    | -    | -    | -    | -    | -    |
| $\alpha$ -Terpineol                                                                                         | 98-55-5    | 1699.00 | 91 | 0.13 | 0.46 | -    | -     | 0.44 | 0.66 | 0.30 | -    | 0.54 | 20.07 | 2.60 | 31.54 | 2.25 | 0.23 | 0.52 | 0.26 | 0.74 | 0.43 | 0.53 |
| (-)- $\alpha$ -Terpineol                                                                                    | 10482-56-1 | N/A     | 90 | -    | -    | 0.40 | 13.87 | -    | -    | -    | -    | -    | -     | -    | -     | -    | 0.25 | -    | -    | -    | -    | -    |
| Valencene                                                                                                   | 4630-07-3  | 1706.00 | 96 | -    | -    | -    | -     | -    | -    | -    | -    | -    | -     | -    | -     | -    | -    | -    | -    | -    | 0.22 | -    |
| (E)-Germacrene D                                                                                            | 23986-74-5 | 1707.00 | 97 | -    | -    | -    | -     | -    | -    | -    | -    | -    | -     | -    | -     | -    | -    | -    | 0.09 | -    | -    | -    |
| Eremophilene                                                                                                | 10219-75-7 | 1709.50 | 96 | -    | 0.10 | -    | -     | -    | -    | -    | 0.86 | -    | -     | -    | -     | -    | -    | 0.14 | -    | -    | -    | -    |
| Guaiene                                                                                                     | 88-84-6    | N/A     | 94 | -    | -    | -    | -     | -    | -    | -    | -    | -    | -     | -    | -     | -    | -    | -    | -    | -    | -    | -    |
| $\alpha$ -Bulnesene                                                                                         | 3691-11-0  | 1714.10 | 99 | -    | -    | -    | -     | 0.36 | -    | -    | -    | -    | -     | -    | -     | -    | -    | -    | 0.37 | -    | -    | -    |

|                                             |              |         |    |      |      |      |      |      |      |      |       |      |      |      |      |       |      |      |      |      |      |      |   |
|---------------------------------------------|--------------|---------|----|------|------|------|------|------|------|------|-------|------|------|------|------|-------|------|------|------|------|------|------|---|
| Longifolene-(V4)                            | 61262-67-7   | N/A     | 95 | -    | -    | -    | -    | -    | -    | -    | -     | -    | -    | -    | -    | -     | -    | -    | -    | -    | -    | -    | - |
| Guaia-9,11-diene                            | 1000374-19-8 | N/A     | 94 | -    | -    | -    | -    | -    | -    | -    | -     | -    | -    | -    | -    | -     | -    | -    | -    | -    | -    | -    | - |
| β-Isocomene                                 | 71596-72-0   | N/A     | 93 | -    | -    | -    | -    | -    | -    | -    | -     | -    | -    | -    | -    | -     | -    | -    | -    | -    | -    | -    | - |
| Geranyl Acetate                             | 105-87-3     | N/A     | 91 | -    | -    | -    | -    | -    | -    | -    | -     | -    | -    | -    | -    | 0.19  | -    | -    | -    | -    | -    | -    | - |
| α-Selinene                                  | 473-13-2     | 1727.00 | 96 | -    | 3.23 | -    | -    | -    | -    | 1.61 | 23.21 | 1.87 | 2.67 | -    | -    | -     | -    | -    | -    | 0.27 | 4.89 | 0.57 |   |
| Selina-4(15),7(11)-Diene                    | 515-17-3     | N/A     | 96 | -    | 0.18 | -    | -    | 1.20 | -    | -    | -     | -    | -    | -    | -    | -     | -    | 1.88 | 0.45 | -    | 0.36 | -    |   |
| 3,5,5-Trimethyl-4-Methylene-2-Cyclohexenone | 20548-00-9   | 1729.20 | 90 | -    | -    | -    | -    | -    | -    | -    | -     | -    | -    | -    | -    | -     | -    | -    | -    | -    | -    | -    | - |
| α-Phellandren-8-ol                          | 1686-20-0    | 1730.00 | 47 | -    | -    | -    | -    | -    | -    | -    | -     | -    | -    | -    | 0.06 | -     | -    | -    | -    | -    | -    | -    | - |
| γ-Maalinene                                 | 20071-49-2   | N/A     | 94 | -    | -    | -    | -    | -    | -    | -    | -     | -    | -    | -    | -    | -     | -    | -    | -    | -    | -    | -    | - |
| 2-Acetyl-3,5-Dimethyl Pyrazine              | 54300-08-2   | N/A     | 43 | -    | -    | -    | -    | -    | -    | -    | -     | -    | -    | -    | -    | -     | -    | -    | -    | -    | -    | -    | - |
| D-Citronellol                               | 1117-61-9    | N/A     | 96 | -    | -    | -    | -    | -    | -    | -    | -     | -    | -    | -    | -    | 0.28  | -    | -    | -    | -    | -    | -    | - |
| (E)-linalool oxide (pyranoid)               | 39028-58-5   | 1742.10 | 72 | -    | -    | 0.15 | 0.11 | -    | 0.55 | -    | -     | -    | -    | -    | -    | -     | 0.06 | -    | -    | 0.4  | -    | 0.41 |   |
| δ-Cadinene                                  | 483-76-1     | N/A     | 98 | -    | -    | -    | -    | -    | -    | -    | 0.96  | -    | -    | -    | -    | -     | -    | 0.06 | 0.19 | -    | -    | -    | - |
| (+)-δ-Amorphene                             | 16729-01-4   | 1757.00 | 97 | -    | -    | -    | -    | 0.15 | -    | -    | -     | -    | -    | -    | -    | -     | -    | -    | -    | -    | -    | -    | - |
| 1,5,9-Trimethyl-1,5,9-Cyclododecatriene     | 21064-19-7   | N/A     | 64 | -    | -    | -    | -    | -    | -    | -    | -     | -    | -    | -    | -    | -     | -    | -    | -    | -    | -    | -    | - |
| β-Selinene                                  | 17066-67-0   | 1761.50 | 99 | -    | 0.09 | -    | -    | -    | -    | -    | 0.90  | -    | -    | -    | -    | -     | -    | 0.1  | -    | -    | 0.12 | -    |   |
| Myrtenol                                    | 515-00-4     | N/A     | 87 | -    | -    | -    | -    | -    | -    | -    | -     | -    | -    | -    | 0.05 | -     | -    | -    | -    | -    | -    | -    | - |
| Nerol                                       | 106-25-2     | 1804.80 | 96 | -    | -    | 0.07 | -    | -    | -    | -    | -     | -    | -    | 0.14 | -    | 18.50 | 0.12 | -    | -    | -    | 0.09 | -    | - |
| Dihydro-β-Ionone                            | 17283-81-7   | 1833.50 | 99 | -    | -    | -    | -    | -    | -    | -    | -     | -    | -    | -    | -    | -     | -    | -    | 0.09 | 0.24 | 0.32 | 1.53 |   |
| Geraniol                                    | 106-24-1     | 1852.70 | 97 | 0.19 | -    | 0.19 | -    | -    | -    | -    | -     | -    | -    | 0.13 | -    | 4.62  | -    | -    | -    | -    | -    | -    | - |
| Phenylethanol                               | 60-12-8      | 1921.20 | 91 | -    | -    | -    | -    | -    | -    | -    | -     | -    | -    | -    | -    | -     | 0.05 | -    | -    | -    | -    | -    | - |
| (E)-β-Ionone                                | 79-77-6      | 1940.60 | 96 | -    | -    | -    | -    | -    | -    | -    | -     | -    | -    | -    | -    | -     | -    | -    | -    | -    | -    | -    | - |
| Cubebol                                     | 23445-02-5   | N/A     | 89 | -    | -    | -    | -    | -    | -    | -    | -     | -    | -    | -    | -    | -     | -    | 0.08 | -    | -    | 0.05 | -    | - |
| Dihydro-β-Ionol                             | 3293-47-8    | 1971.50 | 99 | -    | -    | -    | -    | -    | -    | -    | -     | -    | -    | -    | -    | -     | -    | -    | -    | -    | -    | 0.15 |   |
| Laureth-7                                   | 3055-97-8    | N/A     | 72 | -    | -    | -    | -    | -    | -    | -    | -     | -    | -    | 0.68 | -    | 0.33  | -    | -    | -    | -    | -    | -    | - |





|                                                            |            |         |    |      |      |       |      |      |      |       |      |       |      |      |       |       |       |       |      |
|------------------------------------------------------------|------------|---------|----|------|------|-------|------|------|------|-------|------|-------|------|------|-------|-------|-------|-------|------|
| 1-Methylene-2-Methyl-3-Isopropenylcyclopentane             | 56710-83-9 | N/A     | 91 | -    | -    | -     | -    | -    | -    | -     | -    | -     | -    | -    | -     | -     | 0.12  | -     | -    |
| α-Terpinene                                                | 99-86-5    | 1156.50 | 97 | -    | -    | -     | -    | -    | -    | -     | -    | -     | -    | -    | -     | -     | -     | -     | -    |
| 2,3-Dihydro-1,8-Cineole                                    | 92760-25-3 | 1182.70 | 72 | -    | -    | -     | 0.07 | -    | -    | -     | -    | -     | -    | -    | -     | -     | -     | -     | -    |
| Eucalyptol                                                 | 470-82-6   | 1191.10 | 90 | -    | -    | -     | 2.95 | -    | 0.34 | 0.05  | -    | -     | -    | 0.13 | 0.25  | 0.08  | -     | -     | -    |
| Dipentene                                                  | 138-86-3   | 1193.20 | 94 | -    | -    | -     | -    | -    | -    | -     | -    | -     | -    | -    | -     | -     | -     | -     | -    |
| (E)-dehydroxylinalool oxide                                | 54750-70-8 | N/A     | 97 | -    | 0.14 | -     | -    | -    | -    | 0.08  | 0.05 | 0.08  | -    | -    | 0.06  | -     | 0.11  | 0.11  | -    |
| D-Limonene                                                 | 5989-27-5  | 1176.10 | 97 | 0.2  | 0.77 | 0.12  | 5.93 | 0.3  | 0.83 | 0.3   | 1.19 | 0.27  | 0.39 | 0.77 | 1.3   | 1.18  | 0.33  | 0.4   | -    |
| (Z)-Dehydroxylinalool Oxide                                | 54750-69-5 | 1198.90 | 59 | -    | -    | -     | -    | -    | -    | -     | -    | -     | -    | -    | -     | 0.16  | -     | -     | -    |
| β-Terpinene                                                | 99-84-3    | 1219.70 | 91 | -    | -    | -     | -    | -    | -    | -     | -    | -     | -    | -    | -     | -     | -     | -     | -    |
| (E)-β-Ocimene                                              | 13877-91-3 | 1241.00 | 94 | 49.7 | 1.63 | 4.74  | 0.54 | 2.35 | 0.08 | 39.44 | 1.86 | 6.58  | 0.89 | 8.53 | 10.44 | 14.01 | 29.22 | 16.16 | -    |
| 3,7,7-trimethyl-1,3,5-cycloheptatriene                     | 3479-89-8  | N/A     | 81 | -    | -    | -     | -    | -    | -    | -     | -    | -     | -    | -    | -     | -     | -     | -     | -    |
| (1S,3S)-(E)-4-Carene                                       | 5208-50-4  | 1261.40 | 91 | -    | -    | -     | -    | 0.1  | -    | -     | -    | -     | -    | -    | -     | -     | -     | -     | -    |
| (+)-3-Carene                                               | 498-15-7   | N/A     | 94 | -    | -    | -     | -    | -    | -    | -     | -    | 0.05  | -    | -    | -     | -     | -     | -     | -    |
| α-Pinene                                                   | 80-56-8    | N/A     | 95 | -    | -    | -     | -    | -    | -    | -     | -    | -     | -    | -    | 0.25  | -     | -     | -     | -    |
| β-phellandrene                                             | 555-10-2   | 1184.30 | 95 | -    | -    | -     | -    | -    | 0.16 | -     | -    | -     | -    | -    | -     | -     | -     | -     | -    |
| γ-Terpinene                                                | 99-85-4    | 1226.90 | 97 | -    | -    | -     | 0.65 | 0.05 | 0.12 | -     | -    | -     | -    | -    | -     | 0.25  | -     | -     | -    |
| (Z)-β-Ocimene                                              | 3338-55-4  | 1239.60 | 95 | -    | 4.93 | 52.69 | 0.55 | -    | 0.47 | -     | -    | 26.14 | 1.48 | -    | -     | -     | -     | -     | -    |
| α-Ocimene                                                  | 502-99-8   | 1243.50 | 95 | -    | -    | -     | -    | -    | 0.1  | -     | -    | -     | -    | -    | -     | -     | -     | -     | -    |
| Cyclopropane, 1,1-dimethyl-2-(3-methyl-1,3-butadien-1-yl)- | 68998-21-0 | N/A     | 93 | -    | -    | -     | -    | -    | -    | 0.1   | -    | -     | -    | -    | -     | -     | -     | -     | 0.05 |
| Bicyclo[3.1.1]hept-2-ene,3                                 | 4889-83-2  | 1254.60 | 94 | -    | -    | -     | -    | -    | -    | -     | -    | -     | -    | 0.44 | -     | -     | -     | -     | -    |
| o-Cymene                                                   | 527-84-4   | 1256.90 | 94 | -    | -    | -     | -    | -    | 0.06 | -     | -    | -     | -    | -    | -     | -     | 0.05  | -     | -    |
| Isoterpinolene                                             | 586-63-0   | 1259.40 | 90 | -    | -    | -     | -    | -    | -    | -     | -    | -     | -    | -    | -     | -     | -     | -     | -    |
| m-Cymene                                                   | 535-77-3   | 1263.50 | 93 | -    | -    | -     | 0.06 | -    | -    | -     | -    | -     | -    | -    | 0.12  | 0.12  | -     | -     | -    |
| Terpinolene                                                | 586-62-9   | 1266.20 | 97 | -    | -    | -     | 0.65 | 0.12 | 0.11 | 0.06  | 0.14 | 0.07  | 0.05 | 0.1  | 0.15  | 0.51  | 0.11  | 0.21  | -    |
| (+)-4-Carene                                               | 29050-33-7 | 1267.40 | 96 | -    | -    | -     | 0.17 | -    | 0.08 | -     | -    | -     | -    | 0.09 | -     | -     | -     | -     | -    |
| p-Cymene                                                   | 99-87-6    | 1270.40 | 91 | -    | -    | -     | 0.08 | -    | -    | -     | -    | -     | -    | 0.16 | -     | -     | -     | -     | -    |
| δ-3-carene                                                 | 13466-78-9 | N/A     | 91 | 0.13 | 0.14 | -     | -    | -    | -    | -     | -    | -     | -    | -    | 0.06  | -     | -     | -     | -    |

[illegible]



|                                                         |            |         |    |      |      |      |      |      |      |      |      |      |      |      |     |      |      |      |
|---------------------------------------------------------|------------|---------|----|------|------|------|------|------|------|------|------|------|------|------|-----|------|------|------|
| (E)- $\alpha$ -Damascone                                | 24720-09-0 | 1633.10 | 52 | -    | -    | -    | -    | -    | -    | -    | -    | -    | -    | 0.08 | -   | -    | -    | -    |
| Naphthalene,<br>1,2,3,4,4a,5,6,7-octahydro-             |            |         |    |      |      |      |      |      |      |      |      |      |      |      |     |      |      |      |
| 4-methyl-7-methylene-1-(1-methylethyl)-<br>(1S,4R,4aS)- | 54274-73-6 | 1636.60 | 96 | -    | -    | -    | -    | 0.1  | -    | 0.05 | -    | -    | -    | -    | -   | -    | -    | -    |
| Rotundene                                               | 65128-08-7 | 1637.10 | 62 | -    | -    | 0.23 | -    | 0.09 | -    | -    | 0.31 | 0.24 | 0.05 | -    | -   | -    | -    | -    |
| $\alpha$ -Damascone                                     | 31089-90-4 | 1637.50 | 58 | -    | 0.1  | -    | -    | -    | -    | -    | -    | -    | -    | -    | -   | -    | -    | -    |
| (E)- $\beta$ -Farnesene                                 | 18794-84-8 | 1641.50 | 38 | -    | -    | -    | -    | -    | -    | -    | -    | -    | -    | -    | -   | -    | -    | -    |
| 2-epi-Trans- $\beta$ -Caryophyllene                     | 68832-35-9 | 1644.00 | 99 | -    | -    | -    | -    | -    | -    | -    | 0.06 | -    | -    | -    | -   | -    | -    | -    |
| Safranal                                                | 116-26-7   | 1646.10 | 98 | -    | -    | -    | -    | -    | 0.1  | -    | -    | -    | -    | -    | -   | -    | -    | -    |
| (Z)-Citral                                              | 106-26-3   | N/A     | 96 | -    | -    | -    | -    | -    | -    | -    | -    | -    | -    | -    | -   | -    | -    | -    |
| (+)- $\gamma$ -Gurjunene                                | 22567-17-5 | 1653.70 | 90 | -    | -    | -    | -    | 0.11 | -    | -    | 0.06 | 0.05 | -    | -    | -   | -    | -    | -    |
| 10-Epizonarene                                          | 41702-63-0 | 1671.60 | 91 | -    | 0.07 | -    | -    | 0.11 | -    | -    | -    | -    | -    | 0.19 | -   | 0.11 | -    | -    |
| (-)- $\alpha$ -Gurjunene                                | 489-40-7   | 1672.40 | 99 | -    | -    | -    | -    | 0.31 | -    | 0.14 | 0.11 | -    | 0.12 | -    | -   | 0.35 | -    | -    |
| Piperitenone                                            | 491-09-8   | 1728.20 | 53 | -    | -    | -    | -    | -    | -    | -    | -    | -    | -    | -    | -   | -    | -    | -    |
| Eudesma-3,7(11)-Diene                                   | 6813-21-4  | 1742.10 | 58 | -    | -    | -    | -    | -    | -    | -    | -    | -    | -    | -    | -   | -    | -    | -    |
| $\delta$ -Selinene                                      | 473-14-3   | N/A     | 93 | -    | -    | -    | -    | -    | -    | -    | -    | -    | 0.1  | -    | -   | -    | -    | -    |
| $\beta$ -Maaliene                                       | 489-29-2   | N/A     | 93 | -    | -    | 0.21 | -    | 0.15 | -    | -    | 0.26 | 0.21 | -    | -    | -   | -    | -    | -    |
| (-)-Isodene                                             | 95910-36-4 | N/A     | 95 | -    | -    | -    | -    | -    | -    | 0.06 | -    | -    | 0.05 | -    | -   | -    | -    | -    |
| (+)-Calarene                                            | 17334-55-3 | N/A     | 80 | -    | -    | 0.11 | -    | -    | -    | -    | -    | -    | -    | -    | -   | -    | -    | -    |
| $\alpha$ -Panasinsene                                   | 56633-28-4 | N/A     | 93 | -    | -    | -    | -    | -    | -    | -    | -    | -    | -    | -    | -   | -    | -    | -    |
| Alloaromadendrene                                       | 25246-27-9 | N/A     | 53 | -    | -    | -    | -    | -    | -    | -    | -    | -    | -    | -    | -   | -    | -    | -    |
| $\gamma$ -Muurolene                                     | 30021-74-0 | 1687.20 | 97 | -    | -    | 0.11 | -    | 0.1  | -    | -    | 0.13 | 0.12 | -    | -    | -   | -    | -    | -    |
| Ketoisophorone                                          | 1125-21-9  | 1693.90 | 91 | -    | -    | -    | 0.07 | -    | 0.06 | -    | -    | -    | -    | -    | -   | -    | -    | -    |
| Citral                                                  | 5392-40-5  | N/A     | 91 | -    | -    | -    | -    | -    | -    | -    | -    | -    | -    | -    | -   | -    | -    | -    |
| $\alpha$ -Terpineol                                     | 98-55-5    | 1699.00 | 91 | 0.18 | 0.4  | 0.11 | 9.71 | 0.25 | -    | 0.46 | 0.27 | 0.37 | 0.33 | 0.36 | 1.6 | 0.74 | 0.41 | -    |
| (-)- $\alpha$ -Terpineol                                | 10482-56-1 | N/A     | 90 | -    | -    | -    | -    | -    | 2.47 | -    | -    | -    | -    | -    | -   | -    | -    | 0.73 |
| Valencene                                               | 4630-07-3  | 1706.00 | 96 | -    | -    | -    | -    | -    | -    | -    | -    | -    | -    | -    | -   | -    | -    | -    |
| (E)-Germacrene D                                        | 23986-74-5 | 1707.00 | 97 | -    | -    | 0.07 | -    | -    | -    | -    | 0.09 | 0.14 | -    | -    | -   | -    | -    | -    |
| Eremophilene                                            | 10219-75-7 | 1709.50 | 96 | -    | -    | -    | -    | 0.22 | -    | 0.13 | -    | -    | 0.06 | -    | -   | -    | -    | -    |
| Guaiene                                                 | 88-84-6    | N/A     | 94 | -    | -    | -    | -    | -    | -    | -    | -    | -    | -    | -    | -   | 0.06 | -    | -    |
| $\alpha$ -Bulnesene                                     | 3691-11-0  | 1714.10 | 99 | -    | -    | 0.31 | -    | -    | -    | -    | 0.1  | 0.09 | -    | -    | -   | -    | -    | -    |

[illegible]
